# Supplementary material for: Effect of Electrokinetics and Thermodynamic Equilibrium on Low-Salinity Water Flooding for Enhanced Oil Recovery in Sandstone Reservoirs
Source: PubMed Central journal article supplement — ACS Omega. 2021 Feb 1;6(5):3727–35. doi: 10.1021/acsomega.0c05332 (PMC7906498; doi:10.1021/acsomega.0c05332), 2021-02-01
Supplement: ao0c05332_si_001.pdf [file ao0c05332_si_001.pdf]

Supporting Information for:

**Effect of electrokinetics and thermodynamic equilibrium on low salinity water flooding for enhanced oil recovery in sandstone reservoir**

Yogarajah Elakneswaran <sup>1, \*</sup>, Amir Ubaidah <sup>1</sup>, Miku Takeya <sup>1</sup>, Mai Shimokawara <sup>2</sup>, Hirofumi Okano <sup>2</sup>

<sup>1</sup> Division of Sustainable Resources Engineering

Faculty of Engineering, Hokkaido University

Kita 13, Nishi 8, Kita-ku,

Sapporo, 060-8628, Japan

<sup>2</sup> Japan Oil, Gas and Metals National Corporation (JOGMEC)

Development and Production Technology Division

Research Laboratory Division, Technology Department,

Oil & Gas Upstream Technology Unit

1-2-2 Hamada, Mihama-ku Chiba-city, Chiba, 261-0025, Japan

\* Corresponding author

E-mail: [elakneswaran@eng.hokudai.ac.jp](mailto:elakneswaran@eng.hokudai.ac.jp)

Tel: +81-11-706-7274

**Example PHREEQC input file of triple-layer surface complexation model coupled with phase-equilibrium model for sandstone.**

**SOLUTION 1**

units mmol/kgw

Temp 25

ph 6.33

Na 604.61

Cl 685.47

Ca 14.97

Mg 64.17

S(6) 35.60

water 0.02

**EQUILIBRIUM\_PHASES 1**

Kaolinite 0 5.42E-07

Quartz 0 1.52E-04

K-feldspar 0 1.33E-06

Dolomite 0 8.13E-07

Albite 0 4.58E-07

**SURFACE\_MASTER\_SPECIES**

Surf\_al Surf\_alOH

Surf\_si Surf\_siOH

Surf\_qs Surf\_qsOH

### SURFACE\_SPECIES

Surf\_alOH = Surf\_alOH

-cd\_music 0 0 0

log\_k 0

Surf\_siOH = Surf\_siOH

-cd\_music 0 0 0

log\_k 0

Surf\_alOH + H+ = Surf\_alOH2+

-cd\_music 1 0 0

log\_k 0.8

Surf\_siOH + H+ = Surf\_siOH2+

-cd\_music 1 0 0

log\_k 0.8

Surf\_alOH = Surf\_alO- + H+

-cd\_music -1 0 0

log\_k -7

Surf\_siOH = Surf\_siO- + H+

-cd\_music -1 0 0

log\_k -7

Surf\_alOH + Ca++ = Surf\_alOCa+ + H+

-cd\_music -1 2 0

log\_k -6

Surf\_siOH + Ca++ = Surf\_siOCa+ + H+

-cd\_music -1 2 0

log\_k -6

Surf\_alOH + Mg++ = Surf\_alOMg+ + H+

-cd\_music -1 2 0

log\_k -5.55

Surf\_siOH + Mg++ = Surf\_siOMg+ + H+

-cd\_music -1 2 0

log\_k -5.55

Surf\_qsOH = Surf\_qsOH

-cd\_music 0 0 0

log\_k 0

Surf\_qsOH + H+ = Surf\_qsOH2+

-cd\_music 1 0 0

log\_k -1.75

Surf\_qsOH = Surf\_qsO- + H+

-cd\_music -1 0 0

log\_k -6.75

Surf\_qsOH + Ca++ = Surf\_qsOCa+ + H+

-cd\_music -1 2 0

log\_k -5.7

Surf\_qsOH + Mg++ = Surf\_qsOMg+ + H+

-cd\_music -1 2 0

log\_k -5.70

**SURFACE 1**

-sites\_units Density

-cd\_music

-equilibrate 1

Surf\_alOH 5.5

Surf\_siOH 5.5

Surf\_qsOH 4.6 2.34 0.01

-capacitance 3.098 0.2

**END**
